# Supplementary material for: Telaprevir and Peginterferon with or without Ribavirin for Chronic HCV Infection
Source: Atypon-hosted journal article supplement (doi:10.1056/nejmoa0807650), 2009-04-29
Supplement: nejm_hezode_1839sa1.pdf [file nejm_hezode_1839sa1.pdf]

## Supplementary Appendix

This appendix has been provided by the authors to give readers additional information about their work.

Supplement to: Hézode C, Forestier N, Dusheiko G, et al. Telaprevir and peginterferon with or without ribavirin for chronic HCV infection. *N Engl J Med* 2009;360:1839-50.

**Supplementary Table 1.** Independent predictors of an SVR in multivariate analysis of baseline parameters. The following baseline variables were included in the analysis: gender, age (less or more than 45 years), BMI, baseline HCV RNA level (less or more than 800,000 IU/mL), genotype 1 subtype (1a vs 1b), ALT level, glucose level and treatment arm. Variables with a weak association ( $P>0.20$ ) with the SVR in the initial logistic regression model were excluded from the final model. 95% CI: 95% confidence interval.

| <b>Baseline parameter</b>             | <b>Odds ratio (95% CI)</b> | <b>p value</b> |
|---------------------------------------|----------------------------|----------------|
| Treatment arm T12/PR24                | 3.11 (1.59-5.96)           | 0.001          |
| T12/PR12                              | 1.80 (0.94-3.47)           | 0.08           |
| T12/P12                               | 0.63 (0.32-1.23)           | 0.19           |
| HCV subtype 1b                        | 1.50 (0.93-2.42)           | 0.10           |
| Baseline HCV RNA level <800,000 IU/mL | 4.69 (2.22-9.88)           | < 0.001        |
| Age $\leq$ 45 years                   | 1.59 (0.99-2.57)           | 0.06           |
